# Supplementary material
Source: PubMed Central journal article supplement (PMC3911223)
Supplement: AEM.03310-13_zam999105080so1.pdf [file AEM.03310-13_zam999105080so1.pdf]

**The pine bark adelgid *Pineus strobi*  
contains two novel bacteriocyte-associated  
gammaproteobacterial symbionts**

Elena R. Toenshoff, Gitta Szabó *et al.*

**Supplementary information**

**Table S1.** Populations of adelgids analyzed in this study

| Organism                              | Location (year)                                              | Host plant                                      | GenBank accession numbers (insect host) |                 |
|---------------------------------------|--------------------------------------------------------------|-------------------------------------------------|-----------------------------------------|-----------------|
|                                       |                                                              |                                                 | <i>col</i>                              | <i>eflalpha</i> |
| <i>Pineus strobi</i><br>(Hartig 1837) | Kaltern, Italy (2006)                                        | <i>Pinus strobus</i> L.<br>(eastern white pine) | KC784363                                | KC784365        |
| <i>Pineus strobi</i><br>(Hartig 1837) | Germany,<br>the origin of the host<br>tree is unknown (2011) | <i>Pinus</i> sp.                                | KC784364                                | KC784366        |

**Table S2.** Primers and probes used in this study

| Short name                         | Sequence (5' - 3')                 | Specificity                                                                      | Target site<br>( <i>E. coli</i> ) | T <sub>a</sub> / % FA <sup>a</sup> | Reference  |
|------------------------------------|------------------------------------|----------------------------------------------------------------------------------|-----------------------------------|------------------------------------|------------|
| <b>Host gene targeting primers</b> |                                    |                                                                                  |                                   |                                    |            |
| 911                                | TTT CTA CAA ATC ATA AAG ATA TTG G  | Mitochondrial cytochrome c oxidase subunit 1 ( <i>col</i> ), various eukaryotes  | -                                 | 50                                 | (1)        |
| 912                                | TAA ACT TCA GGG TGA CCA AAA AAT CA | Mitochondrial cytochrome c oxidase subunit 1 ( <i>col</i> ), various eukaryotes  | -                                 | 50                                 | (1)        |
| AdeIEF1F1                          | GTA CAT CCC AAG CCG ATT GT         | Partial nuclear elongation factor 1-alpha ( <i>eflalpha</i> ), various Hemiptera | -                                 | 61                                 | (2)        |
| AdeIEF1F2                          | CTC CAG CTA CAA AAC CAC GA         | Partial nuclear elongation factor 1-alpha ( <i>eflalpha</i> ), various Hemiptera | -                                 | 61                                 | (2)        |
| <b>16S and 23S rRNA primers</b>    |                                    |                                                                                  |                                   |                                    |            |
| 616V                               | AGA GTT TGA TYM TGG CTC            | 16S rRNA gene, most Bacteria                                                     | 8-25                              | 52                                 | (3)        |
| 1492R                              | GGY TAC CTT GTT ACG ACT T          | 16S rRNA gene, most Bacteria and Archaea                                         | 1492-1510                         | 52                                 | (4)        |
| 909F                               | ACT CAA AKG AAT WGA CCG            | 16S rRNA gene, most Bacteria                                                     | 909-926                           | 52                                 | (5)        |
| Ba1492R                            | NTA CCT TGT TAC GAC T              | 16S rRNA gene, most Bacteria and Archaea                                         | 1493-1508                         | 52                                 | (5)        |
| AnnPi-1381R                        | TGG AAA CAT ATT CAC CGT G          | 16S rRNA gene, ' <i>Candidatus Annandia pinicola</i> '                           | 1366-1384                         | 60                                 | this study |
| AnnPi-327F                         | TAC GGT CCA GAC TCT TAC            | 16S rRNA gene, ' <i>Candidatus Annandia pinicola</i> '                           | 327-344                           | 60                                 | this study |
| 255f                               | AGT AGY GGC GAG CGA A              | 23S rRNA gene, Bacteria                                                          | 241-255                           | 50                                 | (6)        |
| 1037R                              | CGA CAA GGA ATT TCG CTA C          | 23S rRNA gene, Bacteria                                                          | 1930-1948                         | 50                                 | (7)        |
| <b>Oligonucleotide probes</b>      |                                    |                                                                                  |                                   |                                    |            |
| EUB338-I                           | GCT GCC TCC CGT AGG AGT            | 16S rRNA gene, most Bacteria                                                     | 338-355                           | 10-50                              | (8)        |
| HarPi-265                          | TCG TTG CCT AGG GGA GCC            | 16S rRNA gene, ' <i>Candidatus Hartigia pinicola</i> '                           | 265-282                           | 10-35                              | this study |
| AnnPi-327                          | GTA AGA GTC TGG ACC GTA            | 16S rRNA gene, ' <i>Candidatus Annandia pinicola</i> '                           | 327-344                           | 10-35                              | this study |
| HarPi-378                          | AAG ATA ACA CGT GCC CCG            | 23S rRNA gene, ' <i>Candidatus Hartigia pinicola</i> '                           | 378-395                           | 10-20                              | this study |
| AnnPi-1439                         | CGC TCT CTT GGC CAA CTT            | 23S rRNA gene, ' <i>Candidatus Annandia pinicola</i> '                           | 1439-1456                         | 10-35                              | this study |

<sup>a</sup> T<sub>a</sub>, annealing temperature; % FA, formamide concentration

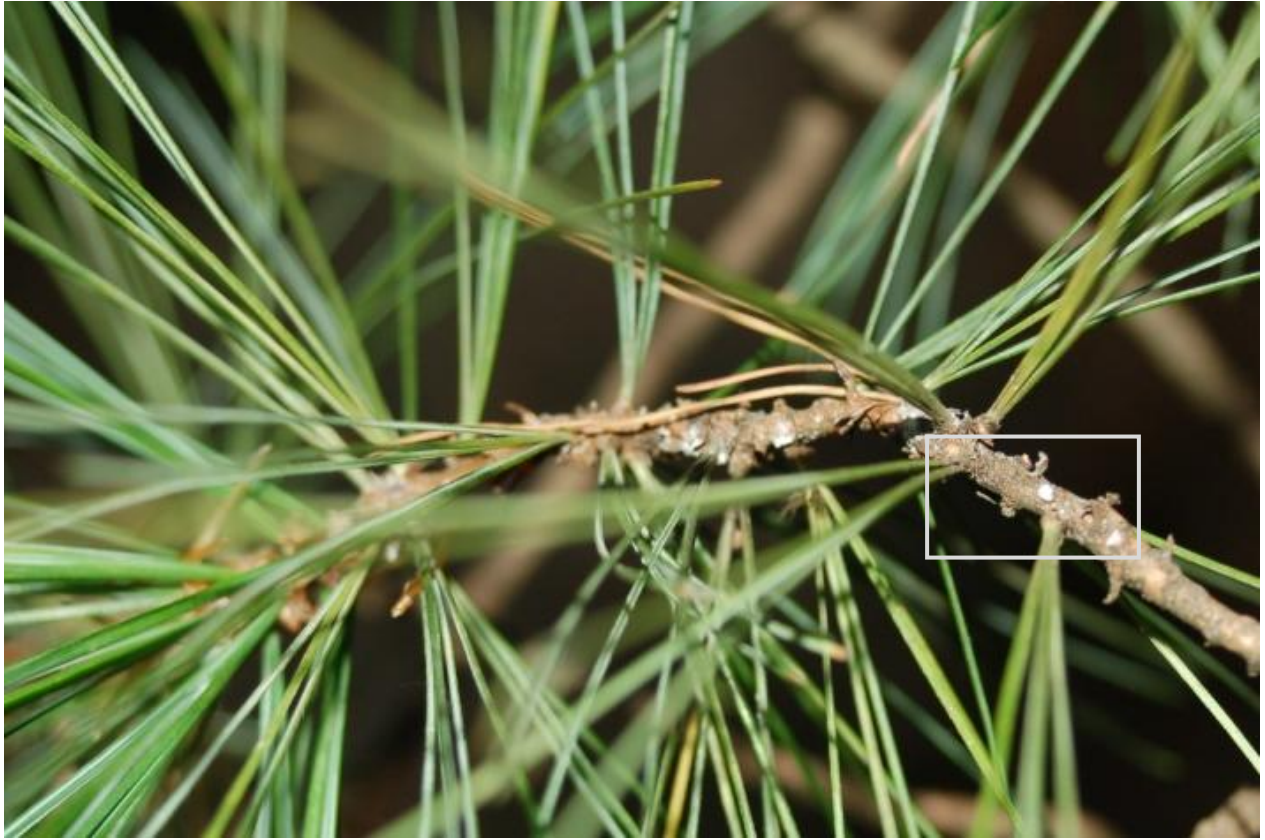

**Figure S1. *Pineus strobi* (exules) sampled in Kaltern and feeding on the secondary host tree pine (*Pinus strobus*). The adelgids recognizable as white dots (grey rectangle) were located on the branch around the needles.**

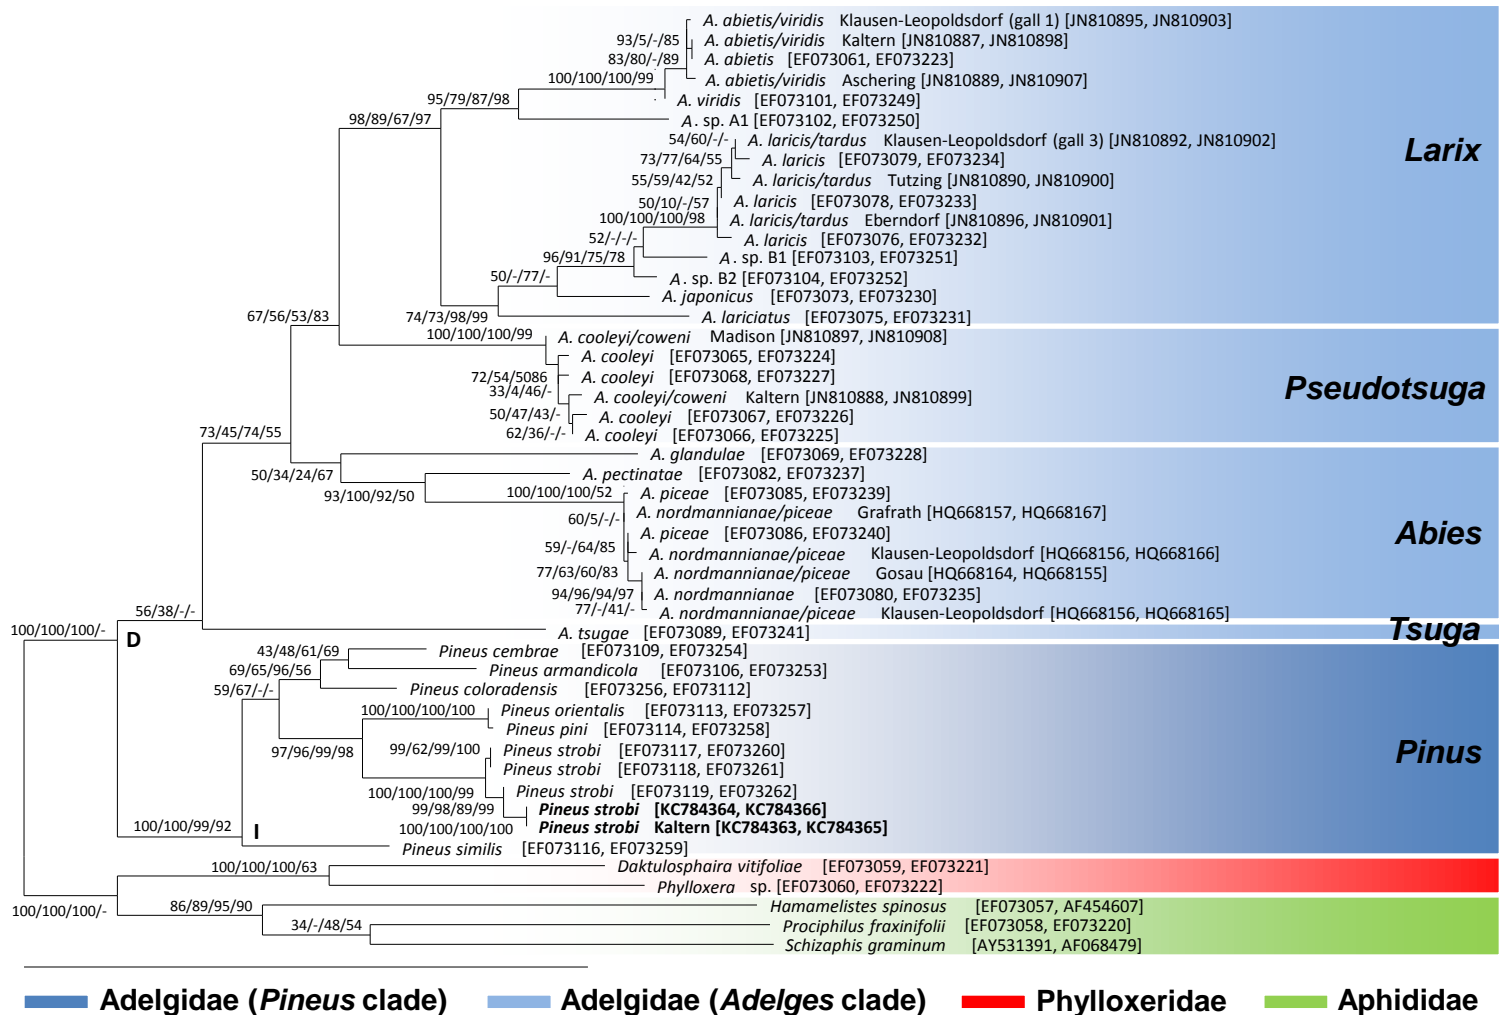

**Figure S2. Phylogenetic affiliation of *Pineus strobi* with the insect family Adelgidae based on a concatenated dataset of the cytochrome c oxidase subunit 1 (*coI*, 624 nuc) and elongation factor 1-alpha (*ef1alpha*, 616 nuc) genes.** Tree calculations were performed using maximum parsimony and TREEPUZZLE implemented in the ARB software package (9). PhyML trees were calculated using the Mobyly portal (<http://mobyly.pasteur.fr/cgi-bin/portal.py>; (10) and Neighbour-joining trees using MEGA (11). A maximum likelihood tree is shown. Maximum likelihood (1000 replicates), maximum parsimony (1000 replicates) and Neighbor-joining (1000 resamplings) bootstrap values, as well as TREEPUZZLE support values are indicated at the internal nodes. Selected members of the Aphididae and Phylloxeridae were used as outgroup. The letters (D =  $88 \pm 14.09$ , I =  $55 \pm 11.67$ ) indicate the estimated divergence times (millions of years  $\pm$  standard deviation) according to Havill *et al.* (12). GenBank/EMBL/DDBJ accession numbers of *coI* and *ef1alpha* are given in square brackets. Bar, 10% estimated evolutionary distance.

## References

1. **Guryev V, Makarevitch I, Blinov A, Martin J. 2001.** Phylogeny of the genus *Chironomus* (Diptera) inferred from DNA sequences of mitochondrial cytochrome b and cytochrome oxidase I. *Mol. Phylogenet. Evol.* **19**:9–21.
2. **Havill NP, Foottit RG, von Dohlen CD. 2007.** Evolution of host specialization in the Adelgidae (Insecta: Hemiptera) inferred from molecular phylogenetics. *Mol. Phylogenet. Evol.* **44**:357–370.
3. **Juretschko S, Timmermann G, Schmid M, Schleifer K-H, Pommerening-Röser A, Koops H-P, Wagner M. 1998.** Combined molecular and conventional analyses of nitrifying bacterium diversity in activated sludge: *Nitrosococcus mobilis* and *Nitrospira*-like bacteria as dominant populations. *Appl. Environ. Microbiol.* **64**:3042–3051.
4. **Loy A, Schulz C, Lücker S, Schöpfer-Wendels A, Stoecker K, Baranyi C, Lehner A, Wagner M. 2005.** 16S rRNA gene-based oligonucleotide microarray for environmental monitoring of the betaproteobacterial order “Rhodocyclales”. *Appl. Environ. Microbiol.* **71**:1373–1386.
5. **Berry D, Mahfoudh KB, Wagner M, Loy A. 2011.** Barcoded primers used in multiplex amplicon pyrosequencing bias amplification. *Appl. Environ. Microbiol.* **77**:7846–7849.
6. **Lane DJ. 1991.** 16S/23S rRNA sequencing. in *Nucleic acid techniques in bacterial systematics*. eds Stackebrandt E., Goodfellow M. (John Wiley & Sons, Chichester, United Kingdom)
7. **Ludwig W, Kirchhof G, Klugbauer N, Weizenegger M, Betzl D, Ehrmann M, Hertel C, Jilg S, Tatzel R, Zitzelsberger H, Liebl S, Hochberger M, Shah J, Lane D, Wallnöfer PR, Scheifer KH. 1992.** Complete 23S ribosomal RNA sequences of Gram-positive bacteria with a low DNA G+C content. *Syst. Appl. Microbiol.* **15**:487–501.
8. **Amann RI, Binder BJ, Olson RJ, Chisholm SW, Devereux R, Stahl DA. 1990.** Combination of 16S rRNA-targeted oligonucleotide probes with flow cytometry for analyzing mixed microbial populations. *Appl. Environ. Microbiol.* **56**:1919–1925.
9. **Ludwig W, Strunk O, Westram R, Richter L, Meier H, Yadhukumar, Buchner A, Lai T, Steppi S, Jobb G, Förster W, Brettske I, Gerber S, Ginhart AW, Gross O, Grumann S, Hermann S, Jost R, König A, Liss T, Lüßmann R, May M, Nonhoff B, Reichel B, Strehlow R, Stamatakis A, Stuckmann N, Vilbig A, Lenke M, Ludwig T, Bode A, Schleifer K-H. 2004.** ARB: a software environment for sequence data. *Nucleic Acids Res.* **32**:1363–1371.
10. **Guindon S, Dufayard J-F, Lefort V, Anisimova M, Hordijk W, Gascuel O. 2010.** New algorithms and methods to estimate maximum-likelihood phylogenies: assessing the performance of PhyML 3.0. *Syst. Biol.* **59**:307–321.
11. **Tamura K, Peterson D, Peterson N, Stecher G, Nei M, Kumar S. 2011.** MEGA5: molecular evolutionary genetics analysis using maximum likelihood, evolutionary distance, and maximum parsimony methods. *Mol. Biol. Evol.* **28**:2731–2739.
12. **Havill NP, Foottit RG, von Dohlen CD. 2007.** Evolution of host specialization in the Adelgidae (Insecta: Hemiptera) inferred from molecular phylogenetics. *Mol. Phylogenet. Evol.* **44**:357–370.
